# Supplementary material
Source: PubMed Central journal article supplement (PMC2712935)
Supplement: NIHMS120314-supplement-Appendix_1.pdf [file NIHMS120314-supplement-Appendix_1.pdf]

## Supplementary Appendix 1

### Study Exclusion Criteria

Specific exclusions were supplemental intake of calcium and/or vitamin D greater than the recommended daily allowance (RDA); supplemental daily intake of vitamin A greater than 10,000 IU/day; a major diet change within the previous six months; an inability to refrain from aspirin use for seven days; current, planned or recent participation in another clinical trial; pregnancy, trying to get pregnant, or breast-feeding; familial adenomatous polyposis; an elevated serum calcium or creatinine; supraphysiologic levels of 25-OH vitamin D at their study eligibility visit; kidney stones or sarcoidosis within the previous 20 years; a history of a bleeding disorder or current use of anticoagulant medication; use of a thiazide diuretic in an amount greater than the equivalent of 50 mg of hydrochlorothiazide daily; immunosuppression; a history of osteoporosis; use of lithium, an ion exchange resin, tetracycline, or indomethacin; renal insufficiency; dementia; cardiovascular disease that moderately or severely limited activity; inflammatory bowel disease; a malignancy other than nonmelanoma skin cancer within the previous five years; hyperparathyroidism or hypoparathyroidism; uncontrolled hypothyroidism or hyperthyroidism; enema or laxative dependence; active peptic ulcer disease; gastrectomy; bowel resection; active liver or pancreatic disease; intestinal malabsorption syndromes; narcotic or alcohol dependence; on a weight loss diet; and a nondeliberate weight loss of 10% or more in previous three months.
